# Supplementary material
Source: PubMed Central journal article supplement (PMC4807513)
Supplement: AEM.03764-15_zam999117032so1.pdf [file AEM.03764-15_zam999117032so1.pdf]

**TABLE S1.** Substrate specificity analysis of six Pip4H enzymes of filamentous fungi.

| Substrate             | Pip4H          |           |           |           |           |           |
|-----------------------|----------------|-----------|-----------|-----------|-----------|-----------|
|                       | <i>Fo</i>      | <i>Fg</i> | <i>Cg</i> | <i>Ao</i> | <i>Pr</i> | <i>An</i> |
| L-Pip                 | + <sup>a</sup> | +         | +         | +         | +         | +         |
| D-Pip                 | -              | -         | -         | -         | -         | +         |
| L-Pro                 | +              | -         | +         | -         | -         | +         |
| D-Pro                 | -              | -         | -         | -         | -         | +         |
| L-Leu                 | +              | +         | +         | +         | +         | -         |
| D-Leu                 | -              | -         | -         | -         | -         | -         |
| L-AABA                | +              | -         | -         | -         | -         | +         |
| D-AABA                | -              | -         | -         | -         | -         | -         |
| <i>cis</i> -5-L-HyPip | +              | +         | +         | +         | +         | +         |

*a*, novel peaks of amino acid products with the molecular weights heavier than their original substrates by 16 Da detected in the LC-MS analysis

FIGURE S1.

A

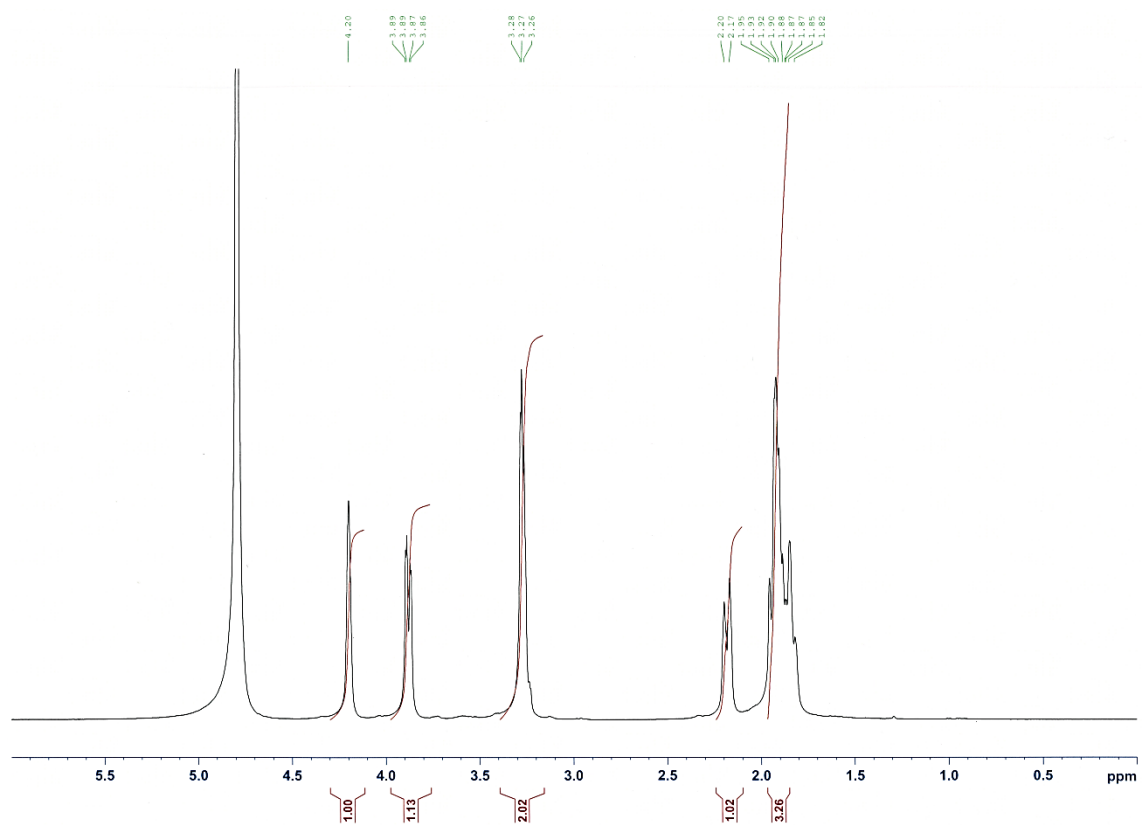

**B**

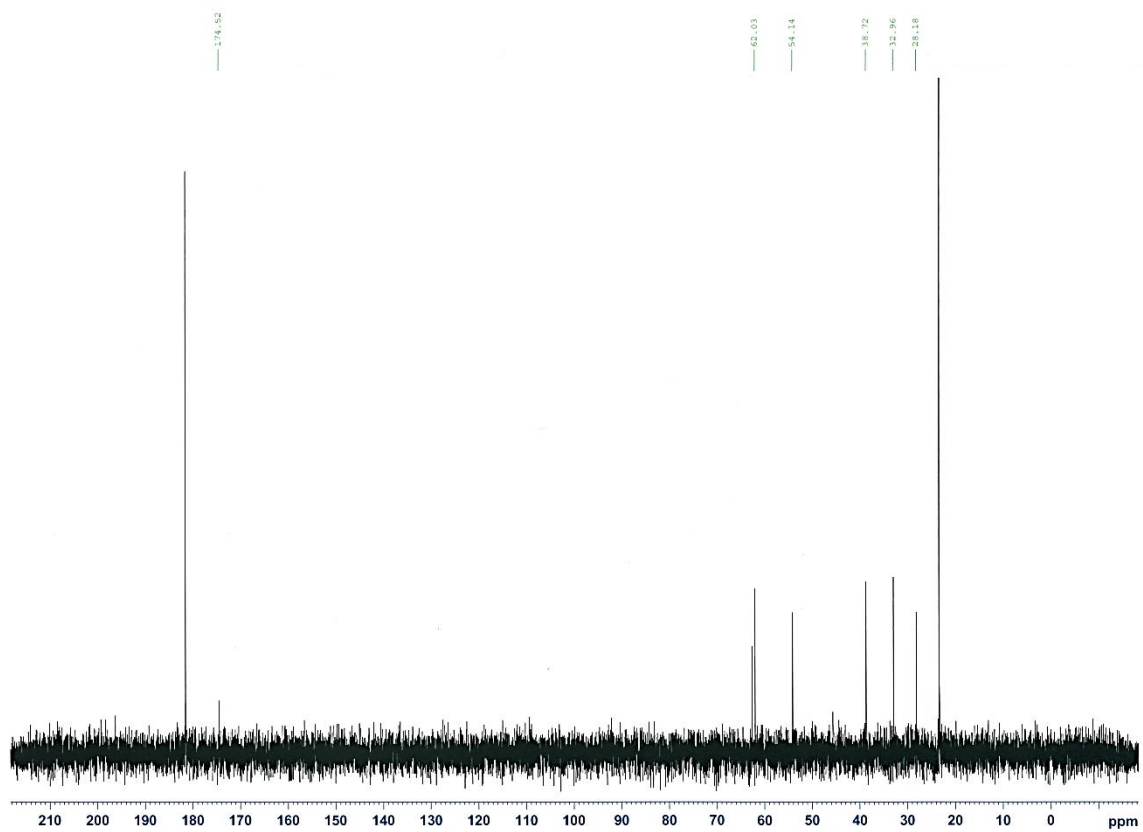

**FIGURE S1.** NMR analysis of *trans*-4-L-HyPip produced in the reaction of *Fusarium oxysporum* c8D.  $^1\text{H}$  NMR (A) and  $^{13}\text{C}$  NMR (B) were recorded on an Avance 500 (BrukerBioSpin, MA, USA).  $\text{D}_2\text{O}$  solution was used for the analysis. Chemical shifts are reported in parts per million (ppm,  $\delta$ ). Coupling constants ( $J$  values) are given in Hz, and peak multiplicities are denoted by s (singlet), d (doublet), dd (doublet of doublets), and m (multiplet).

**FIGURE S2.**

**A**

**L-Pip hydroxylation**

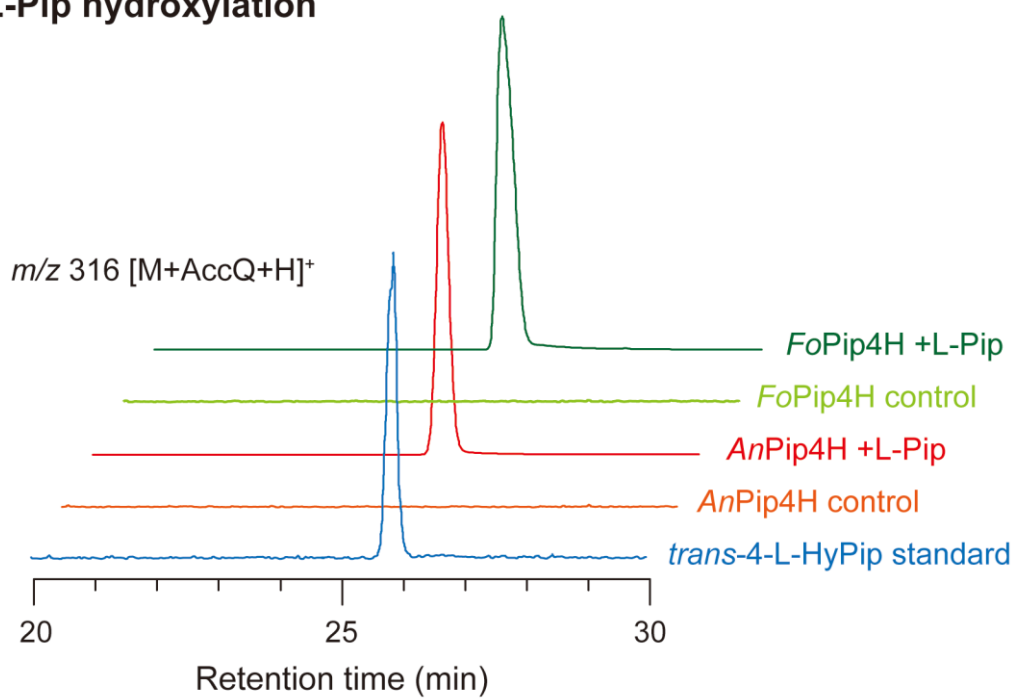

**B**

**D-Pip hydroxylation**

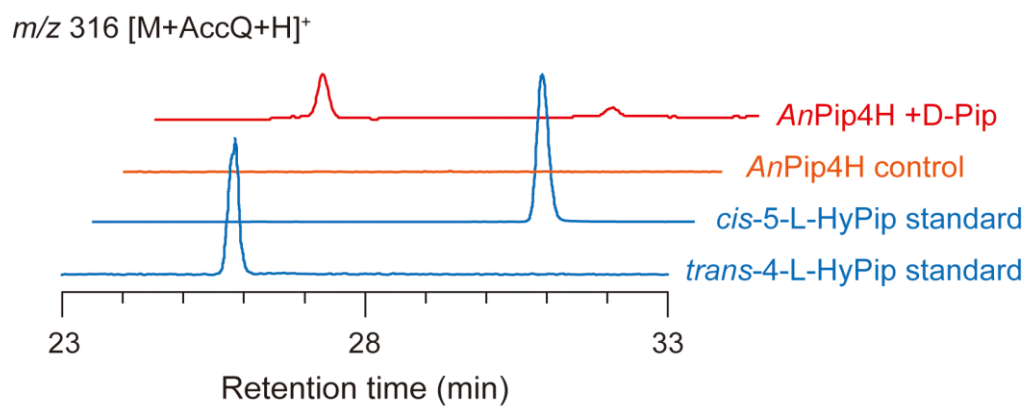

C

***cis*-5-L-HyPip hydroxylation**

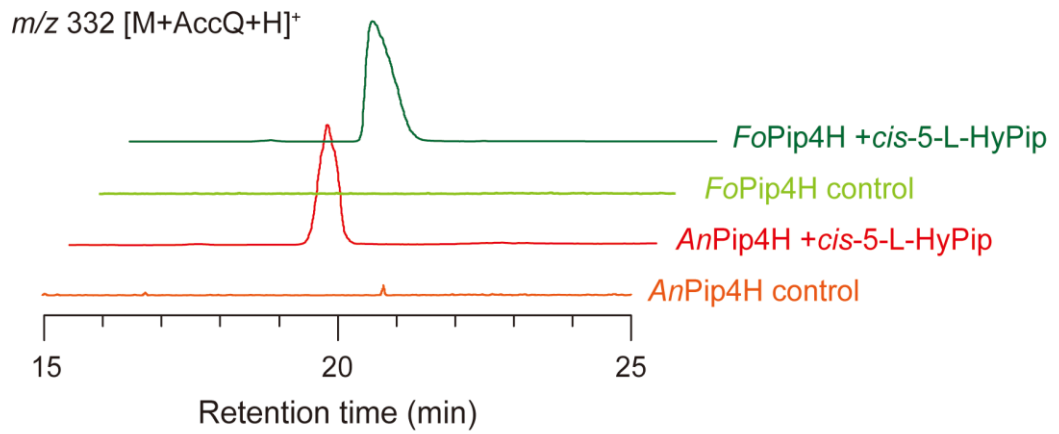

D

**L-Pro hydroxylation**

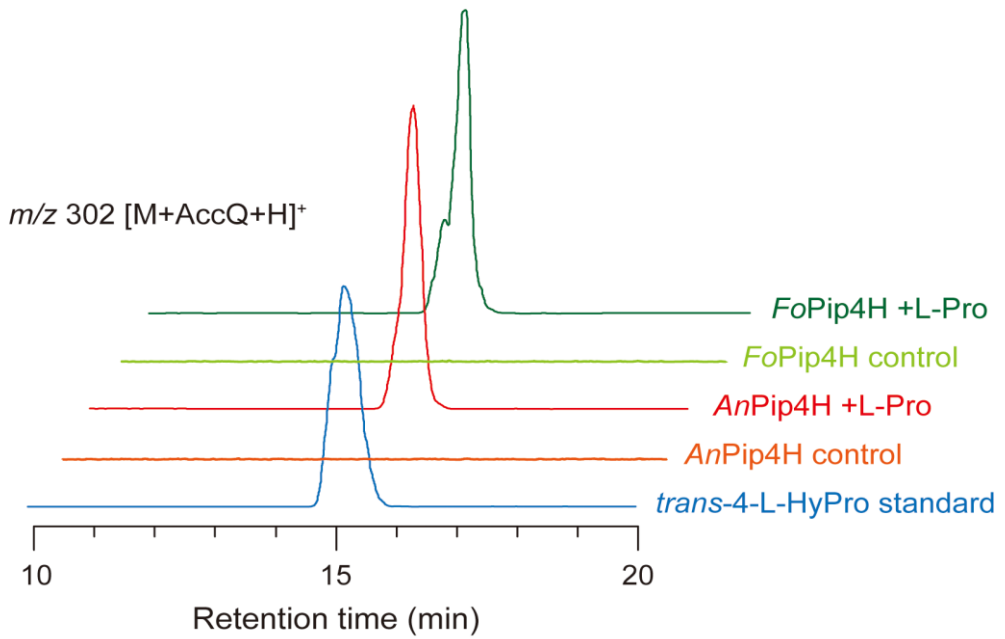

**E**

**D-Pro hydroxylation**

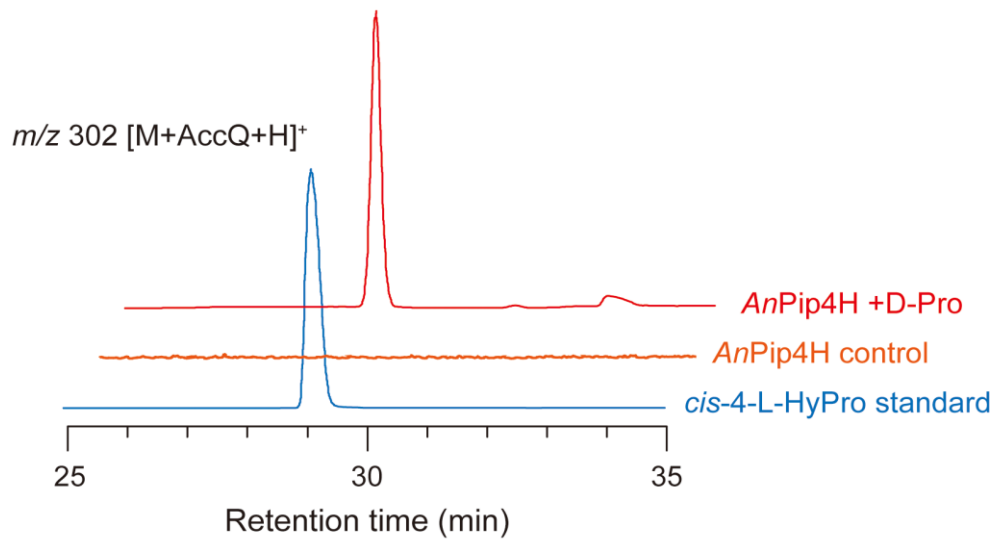

**F**

**L-Leu hydroxylation**

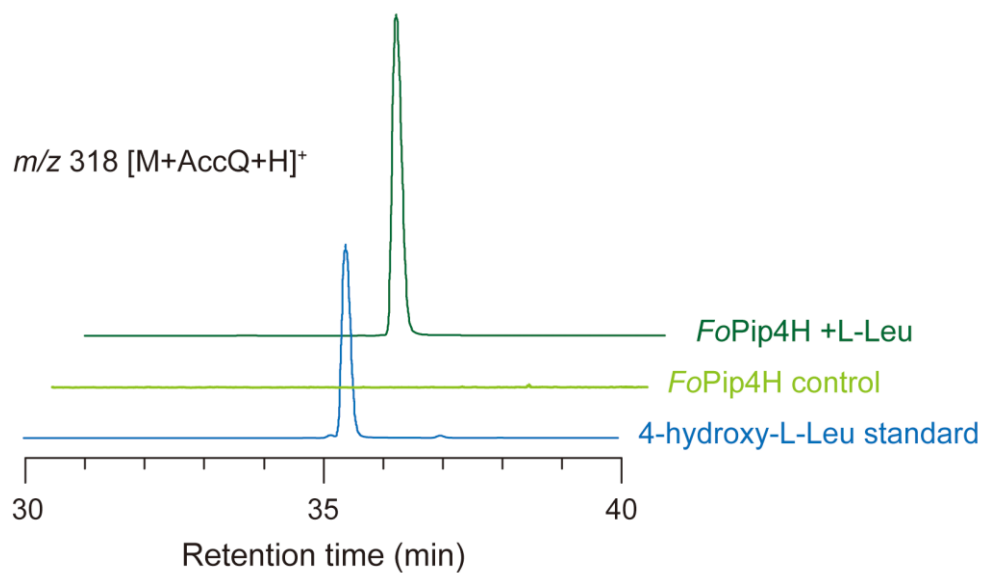

G

### L-AABA hydroxylation

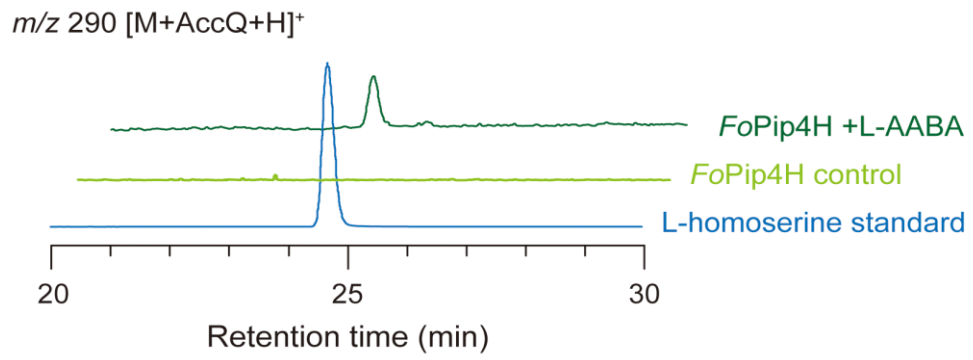



**Figure S2.** HPLC/ESI-MS analysis of AccQ-Tag derivatized amino acids in the reaction mixtures of *FoPip4H* and *AnPip4H* with various substrates. In each figure, a selected-ion monitoring (SIM) chromatogram of the reaction mixture with a substrate, the reaction mixture without substrate, and, if any, a standard reagent of product were shown. (A) Hydroxylation of L-Pip with *FoPip4H* and *AnPip4H*. Reaction mixtures and a standard reagent of *trans*-4-L-HyPip were compared in SIM chromatogram at  $m/z$  316. (B) Hydroxylation of D-Pip with *AnPip4H*. Reaction mixtures and standard reagents of *cis*-5-L-HyPip and *trans*-4-L-HyPip were compared in SIM chromatogram at  $m/z$  316. (C) Hydroxylation of *cis*-5-L-HyPip with *FoPip4H* and *AnPip4H*. Reaction mixtures were compared in SIM chromatogram at  $m/z$  332. (D) Hydroxylation of L-Pro with *FoPip4H* and *AnPip4H*. Reaction mixtures and a standard reagent of *trans*-4-L-HyPro were compared in SIM chromatogram at  $m/z$  302. (E) Hydroxylation of D-Pro with *AnPip4H*. Reaction mixtures and a standard reagent of *cis*-3-L-HyPro were compared in SIM chromatogram at  $m/z$  302. (F) Hydroxylation of L-Leu with *FoPip4H*. Reaction mixtures and a standard reagent of 4-hydroxy-L-Leu were compared in SIM chromatogram at  $m/z$  318. (G) Hydroxylation of L-AABA with *FoPip4H*. Reaction mixtures and a standard reagent of L-homoserine were compared in SIM chromatogram at  $m/z$  290.
